# Supplementary material for: A framework for tracer-based metabolism in mammalian cells by NMR
Source: PubMed Central journal article supplement (PMC6385278; doi:10.1038/s41598-018-37525-3), 2019-02-21
Supplement: 41598_2018_37525_MOESM1_ESM.pdf [file 41598_2018_37525_MOESM1_ESM.pdf]

## **A framework for tracer-based metabolism in mammalian cells by NMR**

Raquel Saborano, Zuhail Eraslan, Jennie Roberts, Farhat L. Khanim, Patricia F. Lalor, Michelle AC Reed, Ulrich L Günther

### **Supplementary Information**

Supplementary Figure 1: Using 1D and TOCSY spectra for tracer-based metabolism.

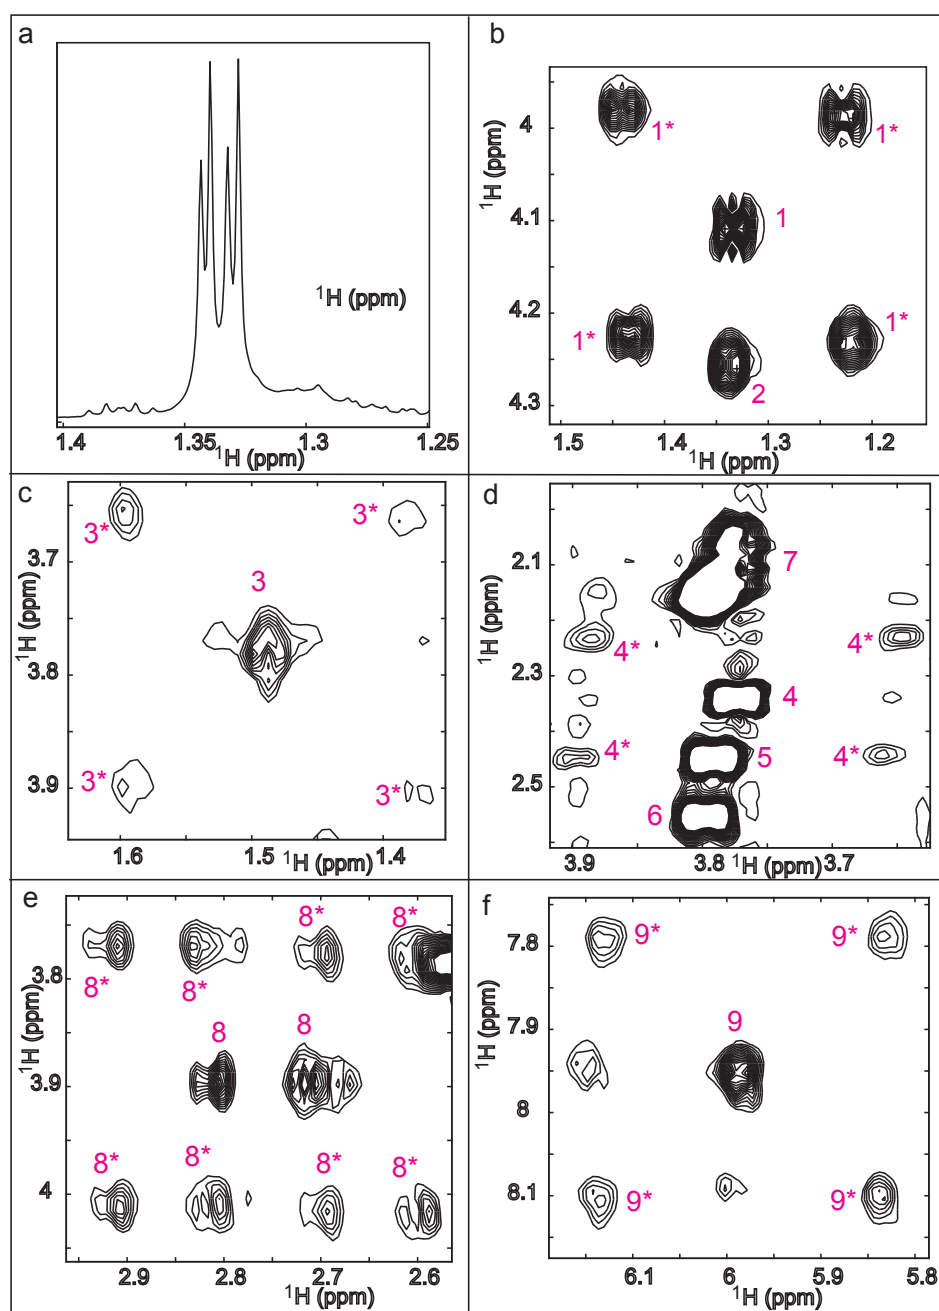

1D and TOCSY spectra have previously been used to analyse labelled metabolite extracts from cells<sup>1</sup> by Lane and Fan, who also list the metabolites and pathways probed. The use of TOCSY spectra is somewhat limited by overlap. While this can be reduced by decoupling <sup>13</sup>C in the incremented dimension, we still find this to be a limiting factor. Here, we show some examples where TOCSY spectra can be used. These include lactic acid, threonine, alanine, glutamic acid and glutamine as well as aspartic acid. Panel a shows the region of the <sup>1</sup>H NOESY spectrum with overlapped doublets from threonine H4 and lactic acid H3. Panels b-f show sections from the <sup>1</sup>H,<sup>1</sup>H-TOCSY; 1=lactic acid H3,H2; 2=threonine H4,H3; 3=alanine H3,H2; 4=glutamic acid H2,H4; 5=glutamine H2,H4; 6=glutathione H2,H4; 7=gluta\* H2,H3; 8=aspartic acid; 9=UDP H5/H6; \* denotes <sup>1</sup>H with attached <sup>13</sup>C. gluta\* is glutathione/glutamine/glutamate.

Supplementary Figure 2:

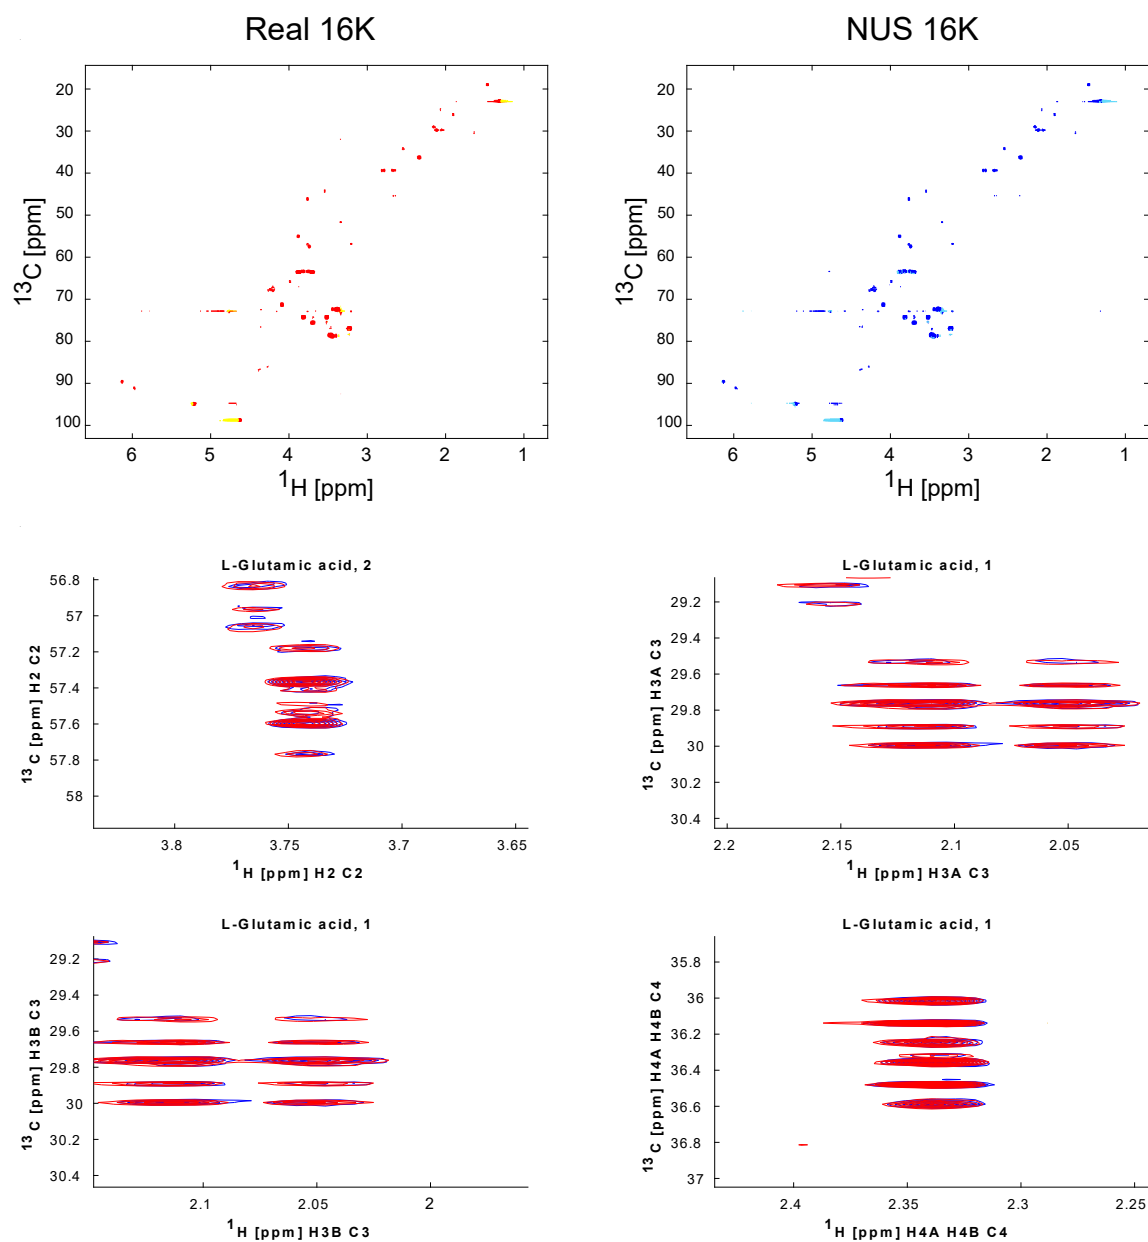

HSQC data for  $^1\text{H}$ - $^{13}\text{C}$ -HSQC spectrum acquired with 16k increments (red) vs 4k increments (blue) with a 25% non-uniformly incremented schedule (NUS). Panel a shows an overview and panel b shows subspectra for glutamic acid. The resulting spectra are virtually indistinguishable; differences are mainly in the noise. NUS spectra were processed using Hybert's<sup>2</sup> hmsIST module in nmrPipe<sup>3</sup>.

### Supplementary Figure 3:

**a** Terminal  $^{13}\text{C}$  atom

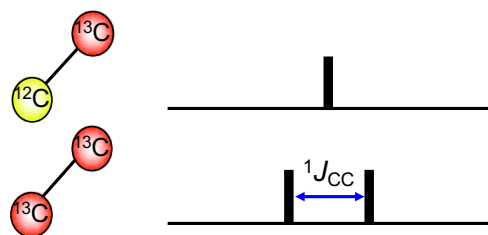

**b**  $^{13}\text{C}$ -atom embedded in a C3-fragment,  $^1J_{\text{CC}} \neq ^1J_{\text{CC}}^*$

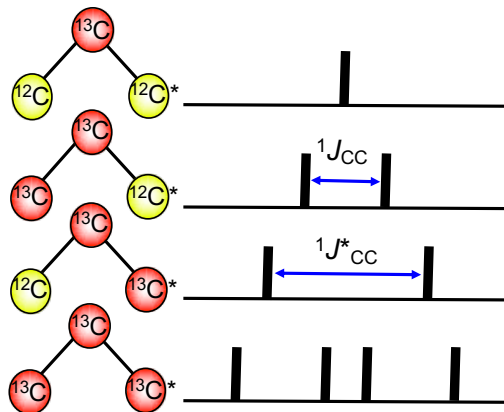

**c**  $^{13}\text{C}$ -atom embedded in a C3-fragment (equal  $^1J_{\text{CC}}$ )

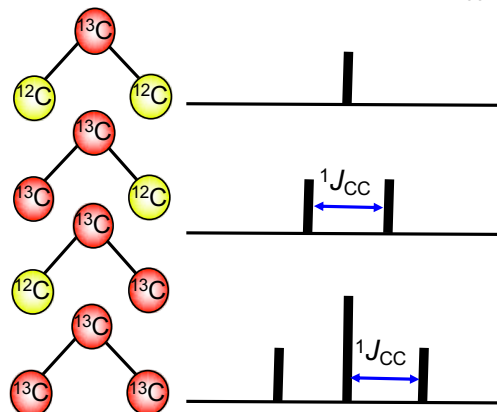

**d** Multiplet patterns arising from mixtures of metabolites where individual patterns appear as superimposed

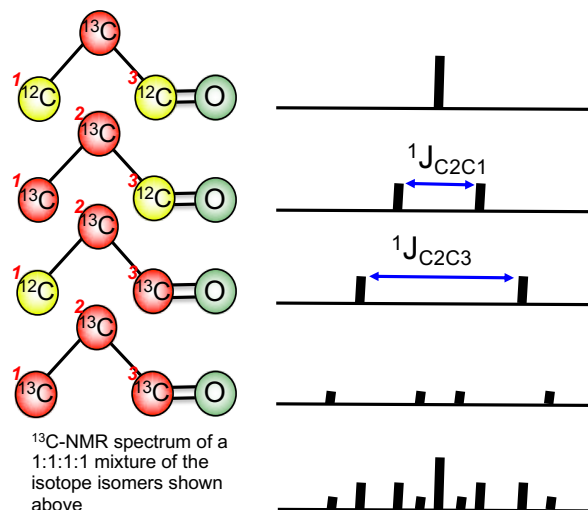

Multiplet structures expected from typical metabolites after  $^{13}\text{C}$ -labeling (derived from <sup>4</sup>). Typically observed scalar coupling constants for metabolites are 46-48 Hz for  $\text{CH}_X - \text{CH}_X$  couplings and 50-60 Hz for  $\text{CH}_X - \text{COOH}$  couplings.

Supplementary Figure 4: Label incorporation in purines and pyrimidines

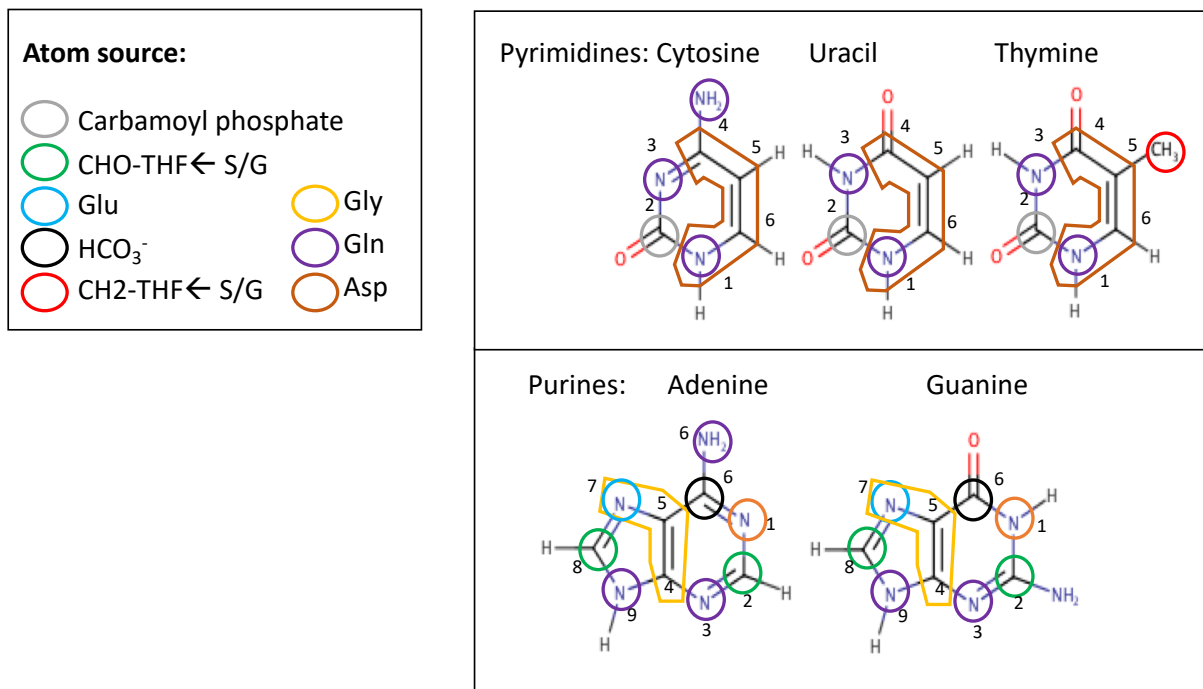

**Supplementary Table 1:** Metabolic pathways amenable to tracer-based analyses

| Pathway                                                            | Label & Experiment                                                                                                                                                         | Focus                                                                                                                                                                                                                                                                                             | Measurement                                                                                                                                                                                                                                                                                                                                                                                                                                                                                                                                                                                                                                                                                                                                                                                                                                                                                                                                                                                                                                                                                                                                                          |
|--------------------------------------------------------------------|----------------------------------------------------------------------------------------------------------------------------------------------------------------------------|---------------------------------------------------------------------------------------------------------------------------------------------------------------------------------------------------------------------------------------------------------------------------------------------------|----------------------------------------------------------------------------------------------------------------------------------------------------------------------------------------------------------------------------------------------------------------------------------------------------------------------------------------------------------------------------------------------------------------------------------------------------------------------------------------------------------------------------------------------------------------------------------------------------------------------------------------------------------------------------------------------------------------------------------------------------------------------------------------------------------------------------------------------------------------------------------------------------------------------------------------------------------------------------------------------------------------------------------------------------------------------------------------------------------------------------------------------------------------------|
| Activity of the full Pentose Phosphate Pathway (PPP) vs glycolysis | [1,2- <sup>13</sup> C]glucose; <sup>1</sup> H, <sup>13</sup> C-HSQC                                                                                                        | Lactic acid C3/H3 resonance                                                                                                                                                                                                                                                                       | The ratio of isolated 3- <sup>13</sup> C to 2,3- <sup>13</sup> C-moiety in lactic acid indicates how active the full PPP is compared with glycolysis [1].                                                                                                                                                                                                                                                                                                                                                                                                                                                                                                                                                                                                                                                                                                                                                                                                                                                                                                                                                                                                            |
| Oxidative vs non-oxidative PPP                                     | [1,2- <sup>13</sup> C]glucose; <sup>1</sup> H, <sup>13</sup> C-HSQC                                                                                                        | C1 resonances of riboses                                                                                                                                                                                                                                                                          | A high ratio of singlet to doublet at C1 is indicative of active oxidative PPP [2].                                                                                                                                                                                                                                                                                                                                                                                                                                                                                                                                                                                                                                                                                                                                                                                                                                                                                                                                                                                                                                                                                  |
| Glycolysis vs glutaminolysis as inputs to the TCA cycle            | [U- <sup>13</sup> C]glucose (or [1,2- <sup>13</sup> C]glucose) and [U- <sup>13</sup> C]glutamine (or [3- <sup>13</sup> C]glutamine); <sup>1</sup> H, <sup>13</sup> C-HSQC. | TCA cycle intermediates' resonance intensities                                                                                                                                                                                                                                                    | Here, the fractional label incorporations into the NMR-observable TCA cycle intermediates ( $\alpha$ -ketoglutarate, citrate, fumarate, succinate and malate) and aspartate in samples prepared with labelled glucose and glutamine may be compared [3].                                                                                                                                                                                                                                                                                                                                                                                                                                                                                                                                                                                                                                                                                                                                                                                                                                                                                                             |
| The PC/PDH (pyruvate carboxylase/pyruvate dehydrogenase) ratio     | 1. [1,2- <sup>13</sup> C]glucose; <sup>1</sup> H/ <sup>13</sup> C-HSQC<br><br>2. [1,2- <sup>13</sup> C]glucose; <sup>13</sup> C 1D NMR                                     | 1.1 The observed coupling constants at the C2 and C3 of aspartate (& malate)<br><br>1.2 The ratio of the doublet to singlet resonances for the C2-Asp-derived carbon of the pyrimidine base rings.<br><br>2. The ratio of doublet to singlet resonance intensities for the carbonate of malonate. | 1.1 PDH gives 1,2- & 3,4- <sup>13</sup> C-labelled aspartate. These coupling constants are large eg 58Hz. PC gives 2,3- <sup>13</sup> C-labelled aspartate. The resulting coupling constant is smaller eg 35Hz. The observed coupling constant will lie between these two values unless there is excellent resolution in the <sup>13</sup> C-dimension and its exact values changes as the PC/PDH ratio changes.<br><br>1.2 When pyrimidines are synthesized from aspartate, 2,3- <sup>13</sup> C labelling in aspartate is transferred to C5-C6 in the pyrimidine base ring. However, 3,4- <sup>13</sup> C labelling in aspartate gives rise to an isolated <sup>13</sup> C at C6 as the carbon, C4 of aspartate is lost. Therefore, the ratio of the doublet to singlet resonances at C6 gives an indication of the PC/PDH ratio.<br><br>2. PDH gives 1,2- <sup>13</sup> C- & 3,4- <sup>13</sup> C-oxaloacetate. This decarboxylates under reactive oxidative stress (ROS) to give a 50:50 mixture of 1,2- <sup>13</sup> C-malonate and 1- <sup>13</sup> C-malonate. Three resonances are seen in a ratio 1:2:1 for the carbonate in the <sup>13</sup> C spectrum. |

|                                                  |                                                                                                                                                 |                                                                                                    |                                                                                                                                                                                                                                                                                                                                                                                                                                                  |
|--------------------------------------------------|-------------------------------------------------------------------------------------------------------------------------------------------------|----------------------------------------------------------------------------------------------------|--------------------------------------------------------------------------------------------------------------------------------------------------------------------------------------------------------------------------------------------------------------------------------------------------------------------------------------------------------------------------------------------------------------------------------------------------|
|                                                  |                                                                                                                                                 |                                                                                                    | PC gives 2,3- <sup>13</sup> C-oxaloacetate. This decarboxylates under ROS to give 1,2- <sup>13</sup> C-malonate and so a doublet is seen for the carbonate in the <sup>13</sup> C spectrum [4].                                                                                                                                                                                                                                                  |
| Transamination reactions in nucleotide synthesis | [ <sup>15</sup> N]glutamine; <sup>1</sup> H, <sup>15</sup> N-HSQC optimized for small <sup>1</sup> H- <sup>15</sup> N 2-4J couplings of 10-5Hz. | Resonances in spectra for coupled <sup>1</sup> H/ <sup>15</sup> N pairs in purines and pyrimidines | Nitrogens in purine and pyrimidine bases result from transamination reactions using Gln or Glu either directly or indirectly via incorporation of Gly or Asp [5].                                                                                                                                                                                                                                                                                |
| γ-glutamyl cycle metabolites                     | No label; <sup>1</sup> H, <sup>13</sup> C-HSQC.                                                                                                 | The C4 resonances of γ-glutamyl cycle intermediates                                                | The C4s of glutamine, glutamic acid, glutathione and pyroglutamic acid are all well-resolved, permitting the identification of changing ratios in response to variables such as drug treatment [6] <sup>5</sup> .                                                                                                                                                                                                                                |
| Creatine production, one carbon metabolism       | [U- <sup>13</sup> C, <sup>15</sup> N]L-serine                                                                                                   | C2 resonances of glycine, guanidoacetate (GAA) and creatine.<br><br>C8 and C14 resonances of AXP   | 2- <sup>13</sup> C guanidoacetate is synthesised from arginine and 2- <sup>13</sup> C glycine. The produced 2- <sup>13</sup> C guanidoacetate is converted to 2- <sup>13</sup> C creatine. 8,14- <sup>13</sup> C AXP results from the synthesis of N <sup>10</sup> -formyl-tetrahydrofolate and N <sup>5</sup> ,N <sup>10</sup> -methenyl-tetrahydrofolate where the transferable carbon is <sup>13</sup> C-labelled from one-carbon metabolism. |

[1] Glycolysis produces 2,3-<sup>13</sup>C-lactic acid and unlabeled lactic acid. The full PPP, followed by subsequent glycolysis reactions, and the action of lactic acid dehydrogenase produces unlabeled, 3-<sup>13</sup>C and 1,3-<sup>13</sup>C labelled pyruvate and lactic acid molecules as the overall reaction is:

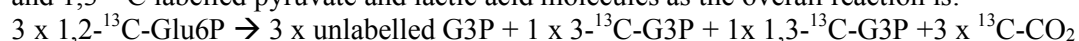

where Glu6P is glucose-6-phosphate and G3P is glyceraldehyde-3-phosphate

Thus, when PPP (the oxidative and non-oxidative branch) is upregulated, the intensity ratio of the resonances of lactic acid C3 vs C2 increases, as previously shown by Conti and coworkers<sup>6</sup>.

[2] In oxidative PPP, the C1 of glucose is lost as carbon dioxide, generating C5-ribose for nucleotide synthesis. As a result, [1,2-<sup>13</sup>C]glucose produces [1-<sup>13</sup>C]riboses. A high ratio of singlet to doublet at C1 is a clear indication of oxidative PPP.

Further reversible reactions of non-oxidative PPP can spread an isolated label to the C2, C3 and C5 positions. As reductive PPP yields [1,2-<sup>13</sup>C] and [4,5-<sup>13</sup>C]riboses, the presence of the latter can be taken as proof for reductive PPP, although the overall label distribution is complex considering that many reversible reactions are involved.

[3] For example, in K562, an AML cell-line, fractional label incorporation was approximately five-fold higher from [3-<sup>13</sup>C]glutamine than from [1,2-<sup>13</sup>C]glucose suggesting that glutamine is a very important anaplerotic substrate in this cell-line<sup>5</sup>.

[4] These approaches to probing PDH vs PC activity were used in our previous work on AML K562 cells. We observed only the doublet for the malonate carbonate in the <sup>13</sup>C spectrum of the [1,2-

$^{13}\text{C}$ ]glucose-labelled AML cell extract suggesting high PC activity in this cell-line<sup>7</sup>. Furthermore, we observed a shift from PC to PDH as flux time increased.

In recent spectra using the hsqcphprsp sequence we were able to resolve the PDH and PC products separately (Figure 3e&f).

[5] The following coupled spins can potentially be seen in labelled samples and all were seen with  $[\text{U-}^{15}\text{N}]\text{ATP}$  or  $[\text{U-}^{15}\text{N}]\text{UTP}$  samples:

In purines:

N1/H2\*, N3/H2\*, N7/H8, N9/H2\*, N9/H8

\* adenine only

In pyrimidines: N1/H5\*, N1/H6, N3/H5\*, N3/H6, N1/H1(of ribose)

\* cytosine and uracil only

Source of the atoms in nucleotide bases.

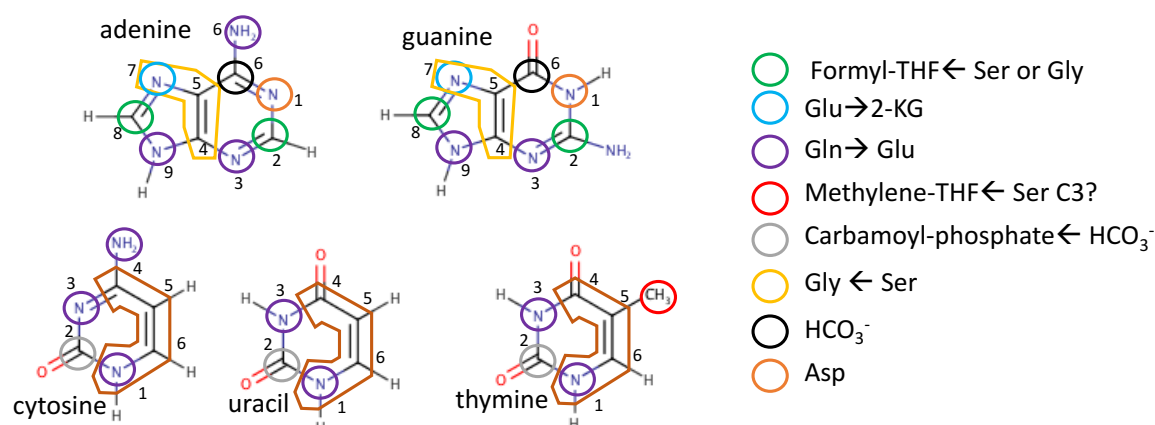

Furthermore, all these resonances were seen in  $^1\text{H-}^{15}\text{N}$  spectra of cell extracts from TALL cell-lines cultured in  $^{15}\text{N}$ -glutamine-labelled media except N3/H5 in pyrimidines and N7/H8 in purines.

[6] The  $\gamma$ -glutamyl cycle can be analysed without labeling<sup>5</sup>. This can however not be resolved in 1D spectra. The greater resolution of the 2D spectra was essential for following the changing ratios of the  $\gamma$ -glutamyl cycle intermediates.

## References

1. Lane, A. N. & Fan, T. W.-M. NMR-based Stable Isotope Resolved Metabolomics in systems biochemistry. *Archives of Biochemistry and Biophysics* **628**, 123–131 (2017).
2. Hyberts, S. G., Milbradt, A. G., Wagner, A. B., Arthanari, H. & Wagner, G. Application of iterative soft thresholding for fast reconstruction of NMR data non-uniformly sampled with multidimensional Poisson Gap scheduling. *J Biomol NMR* **52**, 315–327 (2012).
3. Delaglio, F. *et al.* NMRPipe: A multidimensional spectral processing system based on UNIX pipes. *J Biomol NMR* **6**, 277–293 (1995).
4. Szyperski, T. Biosynthetically Directed Fractional  $^{13}\text{C}$ -labeling of Proteinogenic Amino Acids. *European Journal of Biochemistry* **232**, 433–448 (1995).



5. Carrigan, J. B. *et al.* Tracer-Based Metabolic NMR-Based Flux Analysis in a Leukaemia Cell Line. *ChemPlusChem* n/a-n/a (2016). doi:10.1002/cplu.201500549
6. Miccheli, A. *et al.* Metabolic profiling by <sup>13</sup>C-NMR spectroscopy: [1,2-<sup>13</sup>C<sub>2</sub>]glucose reveals a heterogeneous metabolism in human leukemia T cells. *Biochimie* **88**, 437–448 (2006).
7. Reed, M. A. C., Ludwig, C., Bunce, C. M., Khanim, F. L. & Günther, U. L. Malonate as a ROS product is associated with pyruvate carboxylase activity in acute myeloid leukaemia cells. *Cancer & Metabolism* **4**, (2016).
